# Supplementary material for: A CRISPR-amplified label-free electrochemical aptasensor for the sensitive detection of HbA1c
Source: Royal Society of Chemistry journal article supplement (doi:10.1039/d4sd00193a), 2024-01-01
Supplement: d4sd00193a1.pdf [file d4sd00193a1.pdf]

## Supporting Information

### **A CRISPR-amplified label-free electrochemical aptasensor for the sensitive detection of HbA1c**

Jianfeng Ma, Youwei Zheng, Yaoyao Xie, Dan Zhu, Lianhui Wang \* and Shao Su \*

State Key Laboratory of Organic Electronics and Information Displays & Jiangsu Key Laboratory of Smart Biomaterials and Theranostic Technology, Institute of Advanced Materials (IAM), Nanjing University of Posts and Telecommunications, 9 Wenyuan Road, Nanjing 210023, China.

Corresponding Author: Lianhui Wang and Shao Su

E-mail: iamlhwang@njupt.edu.cn, iamssu@njupt.edu.cn

## Materials and reagents

Hemoglobin (Hb) and glycated hemoglobin (HbA1c) were purchased from Shanghai Xinfan Biotechnology (China). Healthy human serum was purchased from Shanghai Jiwei Biotechnology Co., Ltd (<http://www.givei.cn/product/detail/18142.html>). Cas12a (Cpf1, 100  $\mu$ M), and 10 $\times$  NEBuffer 2.1 (100 mM Tris-HCl, 500 mM NaCl, 100 mM MgCl<sub>2</sub>, 1000  $\mu$ g mL<sup>-1</sup> BSA, pH 7.9) were provided by New England Biolabs (Beijing). Tris(2-carboxyethyl) phosphine (TCEP) and 6-mercapto-1-hexanol (MCH) were obtained from Sigma-Aldrich Co., Ltd (Shanghai). Disodium hydrogen phosphate dodecahydrate (Na<sub>2</sub>HPO<sub>4</sub>·12H<sub>2</sub>O,  $\geq$ 99.0%), sodium dihydrogen phosphate dihydrate (NaH<sub>2</sub>PO<sub>4</sub>·2H<sub>2</sub>O,  $\geq$ 99.0%), potassium ferricyanide (K<sub>3</sub>Fe(CN)<sub>6</sub>), potassium ferrocyanide (K<sub>4</sub>Fe(CN)<sub>6</sub>), uric acid (UA), ascorbic acid (AA), glucose, bovine serum albumin (BSA), magnesium chloride (MgCl<sub>2</sub>), sodium chloride (NaCl) and potassium chloride (KCl) were purchased from Sinopharm Chemical Reagent Co., Ltd. (Shanghai). Phosphate buffer (PB) and phosphate buffered saline (PBS) were prepared by NaH<sub>2</sub>PO<sub>4</sub> (0.2 M), Na<sub>2</sub>HPO<sub>4</sub> (0.2 M) and different salts according to classical protocol. All reagents were analytical grade and used without further purification. Aqueous solutions were prepared by using ultrapure water (>18 M $\Omega$ ·cm) obtained from the Millipore water purification system.

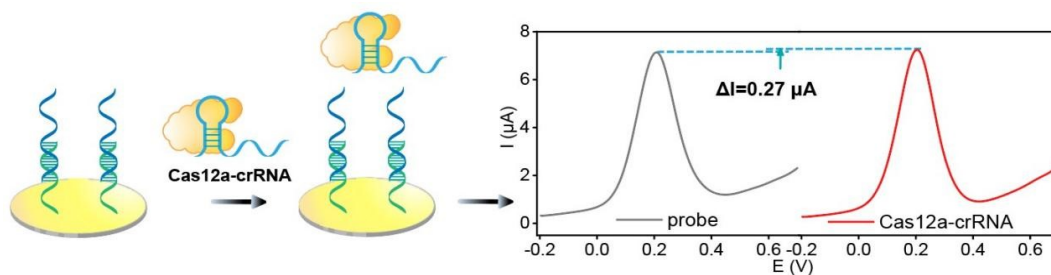

**Figure S1.** Schematic diagram and SWV curve of probe/Au before and after introducing CRISPR-Cas12a system without HbA1c in 0.5 mM  $[\text{Fe}(\text{CN})_6]^{3-/4-}$  solution containing 0.1 M KCl.

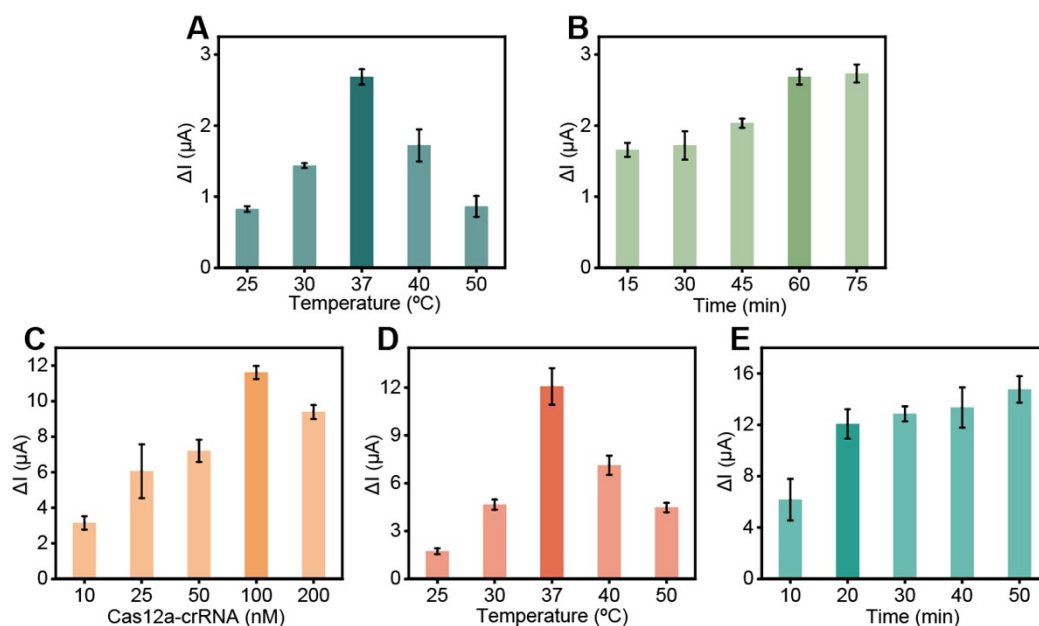

**Figure S2.** The effects of different (A) HbA1c incubation temperatures, (B) HbA1c incubation time, (C) Cas12a-crRNA concentration, (D) CRISPR-Cas12a system incubation temperatures, and (E) CRISPR-Cas12a system incubation time on the current variations ( $\Delta I = I_{\text{HbA1c}} - I_{\text{no HbA1c}}$ ) of electrochemical aptasensor.

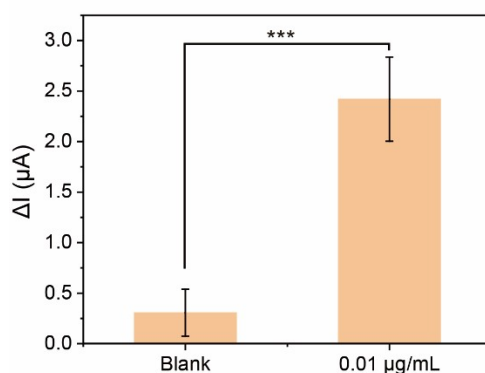

**Figure S3.** The statistical significance between 0.01  $\mu\text{g/mL}$  HbA1c and blank in 50% human serum (\*\*\*)  $P < 0.001$ .

**Table S1.** DNA and RNA sequences required in the experiment (5' to 3' ends).

| Name  | Sequence                                       |
|-------|------------------------------------------------|
| Apt   | ACACACCCACCCACCAGCCCCAGCATCATGCCCATCCGTCGTGTGT |
| cDNA  | SH-TTTTTTTTTTACACACGACGGATGGGCATGA             |
| crRNA | UAAUUUCUACUAAGUGUAGAUUCAUGCCCAUCCGUCGUGUG      |

**Table S2.** Comparison of the analytical performance of the developed aptasensor with other reported biosensors for HbA1c detection.

| Methods                     | Linear range      | Limit of detection | Ref.      |
|-----------------------------|-------------------|--------------------|-----------|
| quartz crystal microbalance | 13-108 nM         | 26.29 nM           | 1         |
| field-effect transistor     | 3-600 nM          | 3 nM               | 2         |
| Surface plasmon resonance   | 18–147 nM         | 1 nM               | 3         |
| electrochemical             | 0.1-14 µg/mL      | 0.084 µg/mL        | 4         |
| electrochemical             | 0.1-100 µg/mL     | 0.016 µg/mL        | 5         |
| Luminol chemiluminescence   | 50–1000 µg/mL     | 350 ng/mL          | 6         |
| electrochemical             | 1 ng/mL-100 µg/mL | 0.84 ng/mL         | This work |

**Table S3.** Analysis of HbA1c in 10 % human serum by using the developed electrochemical aptasensor

| Sample | Added lg (ng/mL) | Found lg (ng/mL) | RSD (%) | Recovery (%) |
|--------|------------------|------------------|---------|--------------|
| 1      | 1                | 1.01             | 9.08    | 101.14       |
| 2      | 2                | 2.02             | 7.29    | 101.15       |
| 3      | 3                | 2.98             | 1.73    | 99.44        |
| 4      | 4                | 4.03             | 2.21    | 100.77       |

**Table S4.** Analysis of HbA1c in 20 % human serum by using the developed electrochemical aptasensor

| Sample | Added lg (ng/mL) | Found lg (ng/mL) | RSD (%) | Recovery (%) |
|--------|------------------|------------------|---------|--------------|
| 1      | 1                | 1.02             | 5.48    | 102.05       |

|   |   |      |      |        |
|---|---|------|------|--------|
| 2 | 2 | 1.95 | 4.27 | 97.44  |
| 3 | 3 | 2.73 | 8.92 | 91.01  |
| 4 | 4 | 4.27 | 5.20 | 106.67 |

**Table S5.** Analysis of HbA1c in 50 % human serum by using the developed electrochemical aptasensor

| Sample | Added lg (ng/mL) | Found lg (ng/mL) | RSD (%) | Recovery (%) |
|--------|------------------|------------------|---------|--------------|
| 1      | 1                | 1.05             | 9.01    | 104.80       |
| 2      | 2                | 1.93             | 4.05    | 96.43        |
| 3      | 3                | 3.19             | 7.50    | 106.49       |
| 4      | 4                | 4.24             | 8.13    | 106.08       |

#### References:

- 1 Y. Sriondee, P. Vijitvarasan, A. Rattanachata, H. Nakajima, S. Oaew and S. Cheunkar, *Anal. Methods*, 2024, **16**, 599-607.
- 2 A. Anand, C.-Y. Chen, T.-H. Chen, Y.-C. Liu, S.-Y. Sheu and Y.-T. Chen, *Nano Today*, 2021, **41**, 101294.
- 3 C. G. Zhang, S. J. Chang, K. Settu, C. Jung Chen and J. T. Liu, *Sensor. Actuat. B-Chem.*, 2019, **279**, 267-273.
- 4 X.-Q. Feng, Y. Ju, W.-T. Dou, Q. Li, Z.-G. Jin, X.-P. He, T. D. James and B.-C. Ye, *Molecules*, 2021, **26**, 7707.
- 5 Y. Zheng, Y. Cen, T. Du, D. Zhu, S. Su and L. Wang, *Chem. Commun.*, 2024, **60**, 3942-3945.
- 6 K.-S. Ahn, J. H. Lee, J.-M. Park, H. N. Choi and W.-Y. Lee, *Biosens. Bioelectron.*, 2016, **75**, 82-87.
